# Supplementary material
Source: HighWire-hosted journal article supplement (https://www.cmaj.ca/highwire/filestream/75645/field_highwire_adjunct_files/0/200650-five-1-at.pdf)
Supplement: 200650-five-1-at.pdf [file 200650-five-1-at.pdf]

**Appendix 1 (as submitted by the authors): Airway Box used at The Ottawa Hospital**  
Image courtesy of George Mastoras.

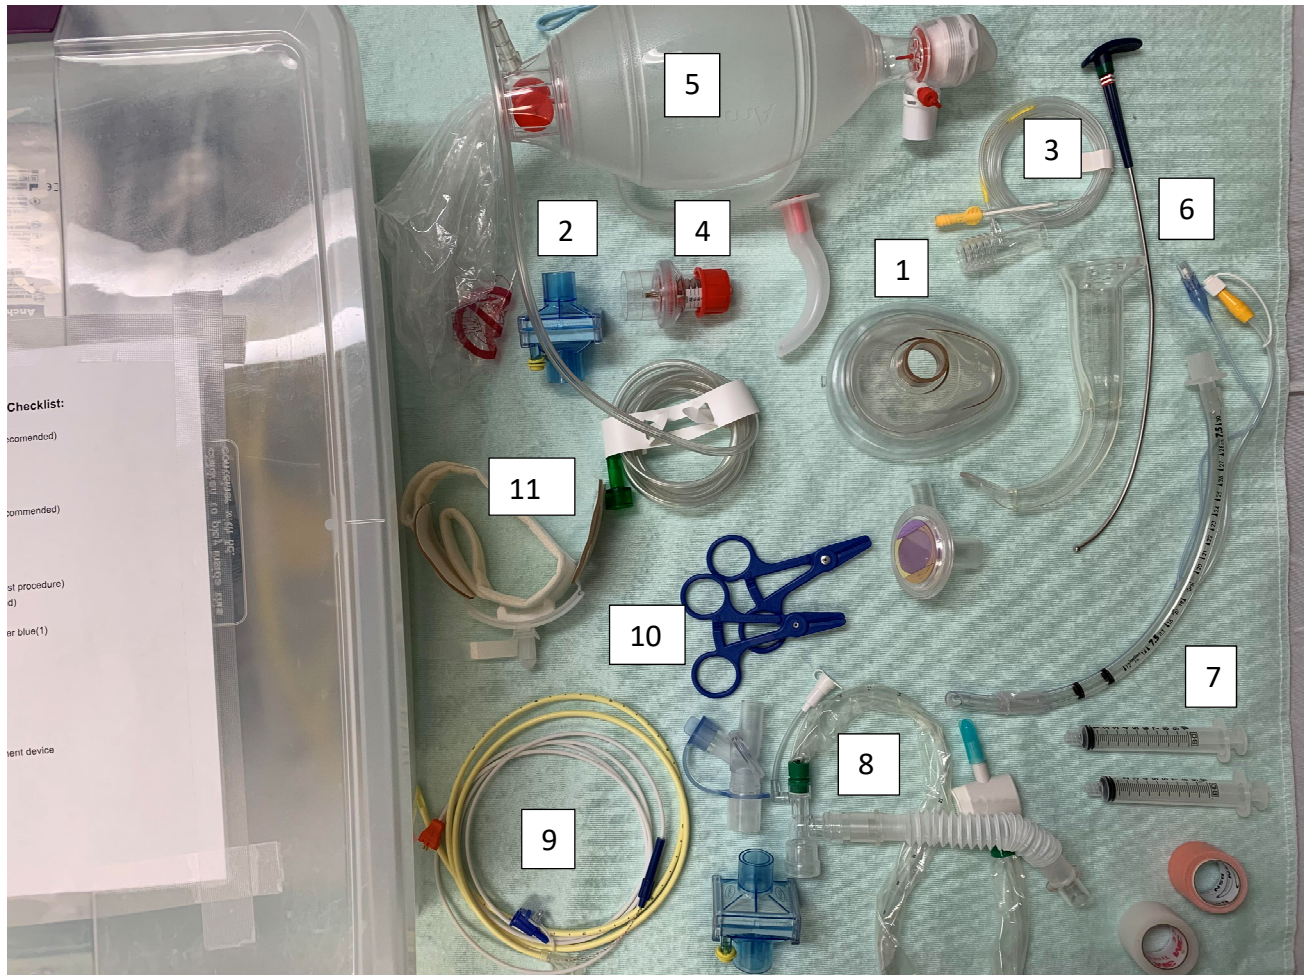

**Components of The Ottawa Hospital Airway Box:**

**Preoxygenation in order of equipment:**

1. Patient mask with soft adjustable air-inflated cuff to ensure seal on patient's face
2. Viral filter
3. Waveform capnography line
4. PEEP valve (usually set at <math><10\text{cm H}\_2\text{O}</math>)
5. Self-inflating oxygen bag with reservoir (oxygen supply not shown)
6. Dedicated Glidescope® stylet, disposable 3.0 blade, 7.5 EVAC ETT
7. Syringes x2 for cuff inflation for redundancy, 2 kinds of tape
8. Viral filter, in-line ETT suction
9. Feeding tube
10. Two clamps for ETT for redundancy in case of circuit disconnection
11. Securement device for ETT

The Airway Box is secured with a plastic breakaway tie to ensure equipment integrity.
